# Supplementary material
Source: Research Square preprint supplement (doi:10.21203/rs.3.rs-9771413/v1)
Supplement: Supplementary file 1 [file 5e372c0678d35a8cd3044cb2.docx]

**Table 1.** Main characteristics of the studies included in the systematic review, highlighting marine microalgae species, synthetic cultivation media, standardization approaches, and biotechnological applications.

| | **Study** | **Microalgae species** | **Synthetic medium** | **Seawater source** | **Main objective** | **Cultivation conditions** | **Evaluated parameter(s)** | **Biotechnological application** | **Main findings** | **Reproducibility/**  **standardization comments** | | --- | --- | --- | --- | --- | --- | --- | --- | --- | --- | | Song et al., 2020 | Crypthecodinium cohnii | Artificial seawater medium supplemented with glucose and yeast extract (pH 6.4) | Artificial seawater | Optimization of growth conditions and DHA production | 25°C, dark conditions, controlled inoculum density (0.15–0.2), optimized C/N ratio (5–10), defined glucose and glutamate concentrations, cultivation in 50 mL tubes with controlled air/culture ratio. | Growth rate, glucose consumption, DHA accumulation | DHA production / nutraceutical biotechnology | Optimized medium reduced cultivation time and improved DHA production | |  | | --- |  | Chemically defined medium improved cultivation control and experimental consistency | | --- | | | Schulzet al., 2016 | Scenedesmus obtusiusculus | Artificial seawater-based medium with optimized BG-11 nutrients | |  | | --- |  | Artificial seawater, Baltic Sea water, and river water | | --- | | Enhancement of lipid and carbohydrate production | Reduced nitrate (−75%), phosphate and iron (−90%) concentrations | Lipid, carbohydrate, protein, and fatty acid composition | Biofuel and biomass production | Increased lipid and carbohydrate accumulation under nutrient-limited conditions | Nutrient optimization influenced biomass composition and cultivation performance | | Ahmad et al., 2024 | Tetraselmis chuii and Dunaliella tertiolecta | Conway, f/2, and TMRL media | Not specified | Evaluation of biochemical composition and cultivation costs in different media | Laboratory-scale cultivation under different synthetic media | Cell density, dry weight, lipids, proteins, carbohydrates, pollutant degradation | Biomass production and bioremediation of emerging pollutants | Conway medium promoted highest biomass and biochemical yields in T. chuii; microalgae-bacterial consortia enhanced pollutant degradation | Medium composition strongly influenced biomass productivity, biochemical profile, and cultivation cost | | Cai et al., 2013 | Synechocystis sp. PCC6803 and Nannochloropsis salina | Artificial seawater (ASW) supplemented with anaerobic digestion effluent (ADE) | Artificial seawater | Evaluation of lipid production using ASW supplemented with ADE | Semi-continuous cultivation under different ADE loading ratios | Growth rate, biomass productivity, lipid productivity, fatty acid composition | Biofuel production | Synechocystis sp. showed higher growth rates, while N. salina exhibited higher lipid productivity | Artificial seawater enabled controlled cultivation conditions and comparative evaluation of lipid productivity | | An et al., 2020. | Haslea ostrearia | |  | | --- |  | NX artificial seawater medium | | --- | | Completely artificial seawater | Optimization of artificial medium for biomass and marennine production | Airlift photobioreactor cultivation with optimized nutrient composition | Biomass productivity, marennine production | Aquaculture, cosmetics, bioactive pigment production | Optimized artificial medium increased biomass and marennine productivity | Controlled artificial seawater composition improved cultivation performance and productivity | | Lanan et al., 2013 | Chlorella sp., Dunaliella sp., Isochrysis sp., Chaetoceros sp., Pavlova sp., and Tetraselmis sp. | Conway and f/2 media | Not specified | Evaluation of microalgal growth in Conway and f/2 media | Laboratory cultivation with cell density monitoring using SLS-PMS | Cell density and population distribution | Microalgal cultivation optimization | |  | | --- |  | Different microalgal genera showed distinct growth preferences depending on the cultivation medium | | --- | | Culture medium composition directly influenced growth performance among microalgal genera | | Colusse et al., 2020 | Dunaliella salina | F/2, Conway, and Johnson media | Not specified | Evaluation of biochemical composition and cultivation cost in different media | Laboratory-scale cultivation with cell counting, biomass and biochemical analyses | Cell growth, dry biomass, pigments, lipid content, media cost | Pigment and lipid production | Conway medium promoted highest biomass and lipid accumulation, while Johnson medium enhanced pigment production | Medium composition strongly influenced biochemical profile, biomass productivity, and cultivation cost | | Khemiri et al., 2022 | Nannochloropsis gaditana L2 and Chlorella sp. SM1 | Algal medium, BG-11, f/2, and Conway media | Not specified | Evaluation of culture media effects on biochemical composition and antioxidant potential | Cultivation under media with different nutrient compositions | Biomass productivity, lipid profile, carbohydrates, phenolic compounds, carotenoids, antioxidant activity | Functional foods and nutraceutical applications | Nitrogen-deficient f/2 medium enhanced lipid, phenolic, and carotenoid accumulation | Medium composition strongly modulated biochemical and antioxidant profiles | | Decamp, 2023 | Porphyridium cruentum | Salinity-modulated cultivation medium | Not specified | Evaluation of salinity effects on polysaccharide production | Parallel mini-photobioreactors under different salinity conditions | Biomass productivity, EPS, BPS, RPS, starch, floridoside accumulation | Polysaccharide and exopolysaccharide production | Salinity strongly influenced biomass productivity and carbohydrate metabolic pathways | Controlled salinity conditions modulated metabolic responses and polysaccharide productivity | | Grubišić et al., 2024 | |  | | --- |  | Nitzschia sp. S5 | | --- | | Optimized modified Guillard f/2 medium | Not specified | Optimization of macronutrient composition for biomass production | Batch and fed-batch cultivation with controlled Si:N:P ratios | Biomass concentration, growth kinetics, protein, carbohydrate, and lipid content | Biomass production | Silicon optimization significantly increased biomass productivity and fed-batch cultivation enhanced biomass accumulation | Controlled macronutrient composition improved cultivation performance and biomass productivity | | Patel et al., 2009 | Dunaliella tertiolecta | Fertilizer-based AG 11 medium | Not specified | Development of low-cost cultivation medium for biofuel production | |  | | --- |  | Cultivation under low-cost fertilizer-based medium conditions | | --- | | Biomass growth and oil yield | Biofuel production | AG 11 medium promoted high oil yield at lower cultivation cost compared to conventional synthetic media | Alternative low-cost medium supported viable large-scale cultivation performance | | Santos et al., 2012 | Neochloris oleoabundans | Modified artificial seawater medium | Artificial seawater | Evaluation of pH and salinity effects on growth and lipid accumulation | Controlled turbidostat cultivation under high salinity and elevated pH | Growth rate, lipid accumulation, fatty acid content | Lipid and biofuel production | Modified artificial seawater prevented mineral precipitation and enhanced lipid accumulation under saline conditions | Controlled pH and salt composition improved medium stability and cultivation | | Panahi et al., 2019 | Neochloris oleoabundans | Modified artificial seawater medium | Artificial seawater | Evaluation of pH and salinity effects on growth and lipid accumulation | Controlled turbidostat cultivation under high salinity and elevated pH | Growth rate, lipid accumulation, fatty acid content | Lipid and biofuel production | Modified artificial seawater prevented mineral precipitation and enhanced lipid accumulation under saline conditions | Controlled pH and salt composition improved medium stability and cultivation | | He et al.,  conclusão | |  | | --- |  | Chlorella pyrenoidosa 689S and 707S | | --- | | Artificial seawater (ASW), TAP′ medium, and natural seawater-based media | Artificial and natural seawater | Evaluation of H2 production under artificial and natural seawater conditions | Nutrient deprivation experiments under sulfur-, nitrogen-, and phosphorus-limited conditions | H2 production, chlorophyll content, anaerobic transition | Biological hydrogen production | Artificial seawater supported H2 production, while natural seawater altered anaerobic transition and H2ase activation | Natural seawater variability significantly affected physiological responses and experimental outcomes | | Yao et al., 2013 | |  | | --- |  | Tetraselmis subcordiformis | | --- | | Salinity-modulated marine cultivation medium | Not specified | Evaluation of salinity effects on biomass and starch accumulation | Nitrogen repletion/depletion under high and low irradiance conditions | Biomass accumulation, starch content, starch productivity | Bioethanol and starch production | Reduced salinity combined with nitrogen depletion enhanced starch accumulation and productivity | Controlled salinity conditions strongly influenced biomass and metabolic responses | |
| --- | --- | --- | --- | --- | --- | --- | --- | --- | --- | --- | --- | --- | --- | --- | --- | --- | --- | --- | --- | --- | --- | --- | --- | --- | --- | --- | --- | --- | --- | --- | --- | --- | --- | --- | --- | --- | --- | --- | --- | --- | --- | --- | --- | --- | --- | --- | --- | --- | --- | --- | --- | --- | --- | --- | --- | --- | --- | --- | --- | --- | --- | --- | --- | --- | --- | --- | --- | --- | --- | --- | --- | --- | --- | --- | --- | --- | --- | --- | --- | --- | --- | --- | --- | --- | --- | --- | --- | --- | --- | --- | --- | --- | --- | --- | --- | --- | --- | --- | --- | --- | --- | --- | --- | --- | --- | --- | --- | --- | --- | --- | --- | --- | --- | --- | --- | --- | --- | --- | --- | --- | --- | --- | --- | --- | --- | --- | --- | --- | --- | --- | --- | --- | --- | --- | --- | --- | --- | --- | --- | --- | --- | --- | --- | --- | --- | --- | --- | --- | --- | --- | --- | --- | --- | --- | --- | --- | --- | --- | --- | --- | --- | --- | --- | --- | --- | --- | --- | --- | --- | --- | --- | --- | --- | --- | --- | --- |
